# Supplementary material for: Association of Prenatal Exposure to Maternal Drinking and Smoking With the Risk of Stillbirth
Source: PubMed Central journal article supplement (PMC8383134; doi:10.1001/jamanetworkopen.2021.21726), 2021-08-23
Supplement: jamanetwopen-e2121726-s002.pdf [file jamanetwopen-e2121726-s002.pdf]

\*Indicates required information. Only first name, last name, and suffix will appear in PubMed.

| <b>*Group Name(s): the PASS Network</b>  |                   |                              |                  |                            |                                          |                                                         |                                                                                            |
|------------------------------------------|-------------------|------------------------------|------------------|----------------------------|------------------------------------------|---------------------------------------------------------|--------------------------------------------------------------------------------------------|
| <b>*First Name and Middle Initial(s)</b> | <b>*Last Name</b> | <b>*Suffix (eg, Jr, III)</b> | Academic Degrees | Institution                | Location (city, state/province, country) | Role or Contribution, eg, chair, principal investigator | Group (if more than 1 Group listed in the byline) and/or Subgroup (eg, Steering Committee) |
| Travis                                   | Baker             |                              | BS               | DM-STAT, Inc.              | Malden, MA, USA                          |                                                         |                                                                                            |
| Rebecca A.                               | Young             |                              | MPH              | DM-STAT, Inc.              | Malden, MA, USA                          |                                                         |                                                                                            |
| Idania                                   | Ramirez           |                              | MPH              | DM-STAT, Inc.              | Malden, MA, USA                          |                                                         |                                                                                            |
| Laura                                    | Spurchise         |                              | MPH              | DM-STAT, Inc.              | Malden, MA, USA                          |                                                         |                                                                                            |
| Derek                                    | Petersen          |                              | BS               | DM-STAT, Inc.              | Malden, MA, USA                          |                                                         |                                                                                            |
| Gregory                                  | Toland            |                              | MS               | DM-STAT, Inc.              | Malden, MA, USA                          |                                                         |                                                                                            |
| Michael                                  | Carmen            |                              | MS               | DM-STAT, Inc.              | Malden, MA, USA                          |                                                         |                                                                                            |
| Cheri                                    | Raffo             |                              | MPH              | DM-STAT, Inc.              | Malden, MA, USA                          |                                                         |                                                                                            |
| Cindy                                    | Mai               |                              | BA               | DM-STAT, Inc.              | Malden, MA, USA                          |                                                         |                                                                                            |
| Jamie                                    | Collins           |                              | PhD              | DM-STAT, Inc.              | Malden, MA, USA                          |                                                         |                                                                                            |
| Patti                                    | Folan             |                              |                  | DM-STAT, Inc.              | Malden, MA, USA                          |                                                         |                                                                                            |
| Ingrid A.                                | Holm              |                              | MD               | Boston Children's Hospital | Boston, MA, USA                          |                                                         |                                                                                            |
| David S.                                 | Paterson          |                              | PhD              | Boston Children's Hospital | Boston, MA, USA                          |                                                         |                                                                                            |
| Richard A.                               | Belliveau         |                              | BA               | Boston Children's Hospital | Boston, MA, USA                          |                                                         |                                                                                            |
| Richard D.                               | Goldstein         |                              | MD               | Boston Children's Hospital | Boston, MA, USA                          |                                                         |                                                                                            |
| Kevin G.                                 | Broadbelt         |                              | PhD              | Boston Children's Hospital | Boston, MA, USA                          |                                                         |                                                                                            |
| Kyriacos                                 | Markianos         |                              | PhD              | Boston Children's Hospital | Boston, MA, USA                          |                                                         |                                                                                            |
| Hanno                                    | Steen             |                              | PhD              | Boston Children's Hospital | Boston, MA, USA                          |                                                         |                                                                                            |
| Hoa                                      | Tran              |                              | PhD              | Boston Children's Hospital | Boston, MA, USA                          |                                                         |                                                                                            |
| Kristin                                  | Rivera            |                              | MS               | Boston Children's Hospital | Boston, MA, USA                          |                                                         |                                                                                            |
| Megan                                    | Minter            |                              | MS               | Boston Children's Hospital | Boston, MA, USA                          |                                                         |                                                                                            |
| Claire F.                                | Maggiotto         |                              | BS               | Boston Children's Hospital | Boston, MA, USA                          |                                                         |                                                                                            |
| Kathryn                                  | Schissler         |                              | DO               | Boston Children's Hospital | Boston, MA, USA                          |                                                         |                                                                                            |
| Whitney                                  | Adler             |                              | BA               | Sanford Research           | Sioux Falls, SD, USA                     |                                                         |                                                                                            |
| Elizabeth                                | Berg              |                              | RN               | Sanford Research           | Sioux Falls, SD, USA                     |                                                         |                                                                                            |
| Christa                                  | Friedrich         |                              | MS               | Sanford Research           | Sioux Falls, SD, USA                     |                                                         |                                                                                            |
| Jessica                                  | Gromer            |                              | RN               | Sanford Research           | Sioux Falls, SD, USA                     |                                                         |                                                                                            |
| Margaret                                 | Jackson           |                              | BA               | Sanford Research           | Sioux Falls, SD, USA                     |                                                         |                                                                                            |
| Luke                                     | Mack              |                              | MA               | Sanford Research           | Sioux Falls, SD, USA                     |                                                         |                                                                                            |

## Supplemental Online Content: Nonauthor Collaborators

\*Indicates required information. Only first name, last name, and suffix will appear in PubMed.

| *First Name and Middle Initial(s) | *Last Name     | *Suffix (eg, Jr, III) | Academic Degrees | Institution      | Location (city, state/province, country) | Role or Contribution, eg, chair, principal investigator | Group (if more than 1 Group listed in the byline) and/or Subgroup (eg, Steering Committee) |
|-----------------------------------|----------------|-----------------------|------------------|------------------|------------------------------------------|---------------------------------------------------------|--------------------------------------------------------------------------------------------|
| Bethany                           | Norton         |                       | MA               | Sanford Research | Sioux Falls, SD, USA                     |                                                         |                                                                                            |
| Liz                               | Swenson        |                       | RN               | Sanford Research | Sioux Falls, SD, USA                     |                                                         |                                                                                            |
| Deborah                           | Tobacco        |                       | MA               | Sanford Research | Sioux Falls, SD, USA                     |                                                         |                                                                                            |
| Amy                               | Willman        |                       | BS, RN           | Sanford Research | Sioux Falls, SD, USA                     |                                                         |                                                                                            |
| Deana A.                          | Him            |                       | PhD              | Sanford Research | Sioux Falls, SD, USA                     |                                                         |                                                                                            |
| Lisa B.                           | Robe           |                       |                  | Sanford Research | Sioux Falls, SD, USA                     |                                                         |                                                                                            |
| Mary                              | Berdahl        |                       | RN, BA           | Sanford Research | Sioux Falls, SD, USA                     |                                                         |                                                                                            |
| Donna                             | Black          |                       | AA               | Sanford Research | Sioux Falls, SD, USA                     |                                                         |                                                                                            |
| Jocelyn                           | Bratton        |                       | BS               | Sanford Research | Sioux Falls, SD, USA                     |                                                         |                                                                                            |
| Chaleen                           | Brewer         |                       | BS               | Sanford Research | Sioux Falls, SD, USA                     |                                                         |                                                                                            |
| Melissa                           | Berry          |                       | RD               | Sanford Research | Sioux Falls, SD, USA                     |                                                         |                                                                                            |
| Cathy                             | Christophersen |                       | MA               | Sanford Research | Sioux Falls, SD, USA                     |                                                         |                                                                                            |
| Sue                               | Cote           |                       | LPN              | Sanford Research | Sioux Falls, SD, USA                     |                                                         |                                                                                            |
| Kari                              | Daron          |                       |                  | Sanford Research | Sioux Falls, SD, USA                     |                                                         |                                                                                            |
| Alexandra                         | Draisey        |                       | BSN, RN          | Sanford Research | Sioux Falls, SD, USA                     |                                                         |                                                                                            |
| Sara                              | Fiedler        |                       | MS               | Sanford Research | Sioux Falls, SD, USA                     |                                                         |                                                                                            |
| Kathy                             | Harris         |                       | RN, BSN          | Sanford Research | Sioux Falls, SD, USA                     |                                                         |                                                                                            |
| Lyn                               | Haug           |                       | RN, BSN, RNC-EFM | Sanford Research | Sioux Falls, SD, USA                     |                                                         |                                                                                            |
| Lynn                              | Heath          |                       | BS, RDMS         | Sanford Research | Sioux Falls, SD, USA                     |                                                         |                                                                                            |
| Ann                               | Henkin         |                       | MS               | Sanford Research | Sioux Falls, SD, USA                     |                                                         |                                                                                            |
| Tara                              | Herman         |                       | RDMS             | Sanford Research | Sioux Falls, SD, USA                     |                                                         |                                                                                            |
| Jessica                           | Holsworth      |                       | BS               | Sanford Research | Sioux Falls, SD, USA                     |                                                         |                                                                                            |
| Kimberly                          | Lucia          |                       | MS               | Sanford Research | Sioux Falls, SD, USA                     |                                                         |                                                                                            |
| Laura                             | Medler         |                       | RN               | Sanford Research | Sioux Falls, SD, USA                     |                                                         |                                                                                            |
| Libby                             | Nail           |                       | MD               | Sanford Research | Sioux Falls, SD, USA                     |                                                         |                                                                                            |
| Amber                             | Ogaard         |                       | BS               | Sanford Research | Sioux Falls, SD, USA                     |                                                         |                                                                                            |
| Debby                             | Olson          |                       | JD               | Sanford Research | Sioux Falls, SD, USA                     |                                                         |                                                                                            |
| Mary                              | Reiner         |                       | BA, CCRP         | Sanford Research | Sioux Falls, SD, USA                     |                                                         |                                                                                            |
| Carol                             | Robinson       |                       | RN               | Sanford Research | Sioux Falls, SD, USA                     |                                                         |                                                                                            |

## Supplemental Online Content: Nonauthor Collaborators

\*Indicates required information. Only first name, last name, and suffix will appear in PubMed.

| *First Name and Middle Initial(s) | *Last Name | *Suffix (eg, Jr, III) | Academic Degrees | Institution             | Location (city, state/province, country) | Role or Contribution, eg, chair, principal investigator | Group (if more than 1 Group listed in the byline) and/or Subgroup (eg, Steering Committee) |
|-----------------------------------|------------|-----------------------|------------------|-------------------------|------------------------------------------|---------------------------------------------------------|--------------------------------------------------------------------------------------------|
| Brooke                            | Schmitt    |                       | BSN, RN          | Sanford Research        | Sioux Falls, SD, USA                     |                                                         |                                                                                            |
| Monique S.                        | Bob        |                       | RN               | Sanford Research        | Sioux Falls, SD, USA                     |                                                         |                                                                                            |
| Lacey                             | Stawarski  |                       | MD               | Sanford Research        | Sioux Falls, SD, USA                     |                                                         |                                                                                            |
| Sherri T.                         | Fingers    |                       | RN               | Sanford Research        | Sioux Falls, SD, USA                     |                                                         |                                                                                            |
| Rachel                            | Thies      |                       | MD               | Sanford Research        | Sioux Falls, SD, USA                     |                                                         |                                                                                            |
| Mary                              | Thum       |                       | MS               | Sanford Research        | Sioux Falls, SD, USA                     |                                                         |                                                                                            |
| Elizabeth                         | Wheeler    |                       | MPH              | Sanford Research        | Sioux Falls, SD, USA                     |                                                         |                                                                                            |
| Lisa W.                           | Bull       |                       | MS               | Sanford Research        | Sioux Falls, SD, USA                     |                                                         |                                                                                            |
| Steve W.                          | Hat        |                       | AAN              | Sanford Research        | Sioux Falls, SD, USA                     |                                                         |                                                                                            |
| Amy                               | Wilson     |                       | RN               | Sanford Research        | Sioux Falls, SD, USA                     |                                                         |                                                                                            |
| Neva                              | Zephier    |                       | MPH              | Sanford Research        | Sioux Falls, SD, USA                     |                                                         |                                                                                            |
| Misti                             | Zubke      |                       | BS, RDMS         | Sanford Research        | Sioux Falls, SD, USA                     |                                                         |                                                                                            |
| Heidi                             | Bittner    |                       | MD               | Sanford Research        | Sioux Falls, SD, USA                     |                                                         |                                                                                            |
| Jeffrey                           | Boyle      |                       | MD               | Sanford Research        | Sioux Falls, SD, USA                     |                                                         |                                                                                            |
| Donna                             | Gaspar     |                       | RN, MA           | Sanford Research        | Sioux Falls, SD, USA                     |                                                         |                                                                                            |
| Cheryl                            | Hefta      |                       | MS, RN           | Sanford Research        | Sioux Falls, SD, USA                     |                                                         |                                                                                            |
| Michael                           | McNamara   |                       | MD               | Sanford Research        | Sioux Falls, SD, USA                     |                                                         |                                                                                            |
| Karna                             | Colby      |                       | MD               | Sanford Research        | Sioux Falls, SD, USA                     |                                                         |                                                                                            |
| Kent                              | Donelan    |                       | MD               | Sanford Research        | Sioux Falls, SD, USA                     |                                                         |                                                                                            |
| Don                               | Habbe      |                       | MD               | Sanford Research        | Sioux Falls, SD, USA                     |                                                         |                                                                                            |
| Catherine                         | Stoos      |                       | MD               | Sanford Research        | Sioux Falls, SD, USA                     |                                                         |                                                                                            |
| H. Eugene                         | Hoyme      |                       | MD               | Sanford Research        | Sioux Falls, SD, USA                     |                                                         |                                                                                            |
| Amy                               | Mroch      |                       | MS               | Sanford Research        | Sioux Falls, SD, USA                     |                                                         |                                                                                            |
| Erna                              | Carstens   |                       | RN               | Stellenbosch University | Stellenbosch, South Africa               |                                                         |                                                                                            |
| Lucy                              | Brink      |                       | MS               | Stellenbosch University | Stellenbosch, South Africa               |                                                         |                                                                                            |
| Lut                               | Geerts     |                       | MD,<br>MRCOG     | Stellenbosch University | Stellenbosch, South Africa               |                                                         |                                                                                            |

## Supplemental Online Content: Nonauthor Collaborators

\*Indicates required information. Only first name, last name, and suffix will appear in PubMed.

| *First Name and Middle Initial(s) | *Last Name | *Suffix (eg, Jr, III) | Academic Degrees | Institution                               | Location (city, state/province, country) | Role or Contribution, eg, chair, principal investigator | Group (if more than 1 Group listed in the byline) and/or Subgroup (eg, Steering Committee) |
|-----------------------------------|------------|-----------------------|------------------|-------------------------------------------|------------------------------------------|---------------------------------------------------------|--------------------------------------------------------------------------------------------|
| Greetje                           | de Jong    |                       | MBCbB, MMed, MD  | Stellenbosch University                   | Stellenbosch, South Africa               |                                                         |                                                                                            |
| Pawel                             | Schubert   |                       | FCFor Path, MMed | Stellenbosch University                   | Stellenbosch, South Africa               |                                                         |                                                                                            |
| Shabbir                           | Wadee      |                       | MMed             | Stellenbosch University                   | Stellenbosch, South Africa               |                                                         |                                                                                            |
| Johan                             | Dempers    |                       | FCFor Path       | Stellenbosch University                   | Stellenbosch, South Africa               |                                                         |                                                                                            |
| Elsie                             | Burger     |                       | FCFor Path, MMed | Stellenbosch University                   | Stellenbosch, South Africa               |                                                         |                                                                                            |
| Janetta                           | Harbron    |                       | PhD              | Stellenbosch University                   | Stellenbosch, South Africa               |                                                         |                                                                                            |
| J. David                          | Nugent     |                       | MA               | Columbia University Irving Medical Center | New York, NY, USA                        |                                                         |                                                                                            |
| Carmen                            | Condon     |                       | BA               | Columbia University Irving Medical Center | New York, NY, USA                        |                                                         |                                                                                            |
| Joseph                            | Isler      |                       | PhD              | Columbia University Irving Medical Center | New York, NY, USA                        |                                                         |                                                                                            |
| Margaret C.                       | Shair      |                       | BA               | Columbia University Irving Medical Center | New York, NY, USA                        |                                                         |                                                                                            |
| Yvonne                            | Sininger   |                       | PhD              | Columbia University Irving Medical Center | New York, NY, USA                        |                                                         |                                                                                            |
| Chuan-Ming                        | Li         |                       | MD, PhD          | NIH                                       | Bethesda, MD, USA                        |                                                         |                                                                                            |
| Caroline                          | Signore    |                       | MD, MPH          | NIH                                       | Bethesda, MD, USA                        |                                                         |                                                                                            |
| Ken                               | Warren     |                       | PhD              | NIH                                       | Bethesda, MD, USA                        |                                                         |                                                                                            |
| Elizabeth                         | Thom       |                       | PhD              | George Washington University              | Washington, DC, USA                      |                                                         |                                                                                            |
| Phillip                           | Cato       |                       | PhD              | Duke University                           | Durham, NC, USA                          |                                                         |                                                                                            |
| James W.                          | Collins    |                       | MD, MPH          | Northwestern University                   | Evanston, IL, USA                        |                                                         |                                                                                            |

## Supplemental Online Content: Nonauthor Collaborators

\*Indicates required information. Only first name, last name, and suffix will appear in PubMed.

| <b>*First Name and Middle Initial(s)</b> | <b>*Last Name</b> | <b>*Suffix (eg, Jr, III)</b> | Academic Degrees | Institution                                                | Location (city, state/province, country) | Role or Contribution, eg, chair, principal investigator | Group (if more than 1 Group listed in the byline) and/or Subgroup (eg, Steering Committee) |
|------------------------------------------|-------------------|------------------------------|------------------|------------------------------------------------------------|------------------------------------------|---------------------------------------------------------|--------------------------------------------------------------------------------------------|
| Terry                                    | Dwyer             |                              | MD, MPH          | University of Oxford                                       | Oxford, United Kingdom                   |                                                         |                                                                                            |
| George                                   | Macones           |                              | MD               | Washington University                                      | St. Louis, MO, USA                       |                                                         |                                                                                            |
| Philip A.                                | May               |                              | PhD              | University of North Carolina at Chapel Hill                | Chapel Hill, NC, USA                     |                                                         |                                                                                            |
| Richard M.                               | Pauli             |                              | MD, PhD          | University of Wisconsin                                    | Madison, WI, USA                         |                                                         |                                                                                            |
| Raymond W.                               | Redline           |                              | MD               | University Hospitals Case Medical Center                   | Cleveland, OH, USA                       |                                                         |                                                                                            |
| Michael                                  | Varner            |                              | MD               | University of Utah Health Sciences Center                  | Salt Lake City, UT, USA                  |                                                         |                                                                                            |
| Dale                                     | Hereld            |                              | PhD              | National Institute on Alcohol Abuse and Alcoholism (NIAAA) | Rockville, MD, USA                       |                                                         |                                                                                            |
